# Supplementary material for: Sex-Dependent Effects of Intestinal Microbiome Manipulation in a Mouse Model of Alzheimer’s Disease
Source: MDPI journal article supplement (doi:10.3390/cells10092370), 2021-09-09
Supplement: s1 [file s1]

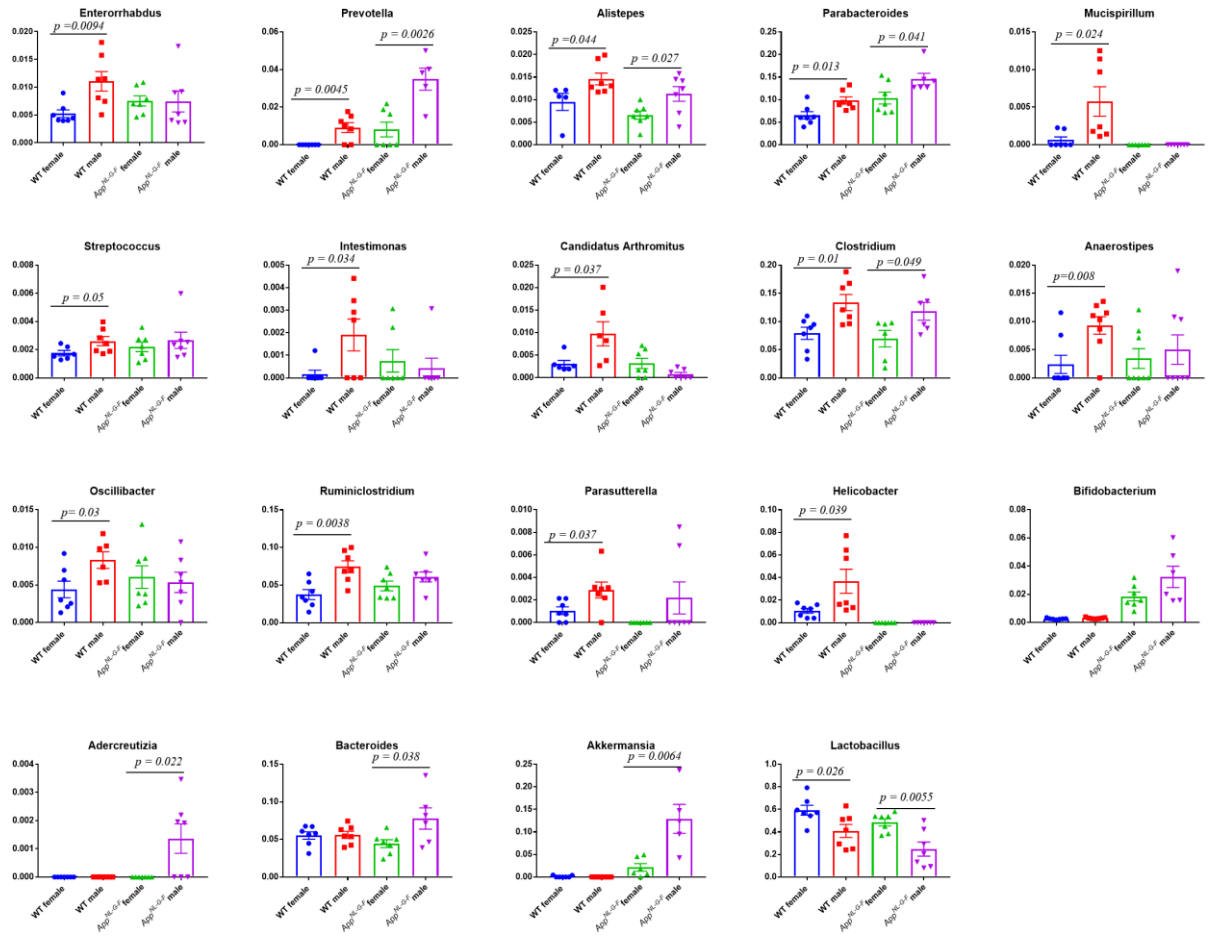

**Figure S1.** Microbiome difference in the fecal samples of C57BL/6J (WT) and *App*<sup>NL-G-F</sup> female and male mice. The relative abundance of significantly different bacteria genera in male and female C57BL/6J (WT) and *App*<sup>NL-G-F</sup> mice are plotted. The differences in the bacterial composition of male vs. female C57BL/6J (WT) and male vs. female *App*<sup>NL-G-F</sup> mice were determined by unpaired t-test, \*  $p < 0.05$ . Data are presented as mean  $\pm$  SEM,  $n = 7$ .

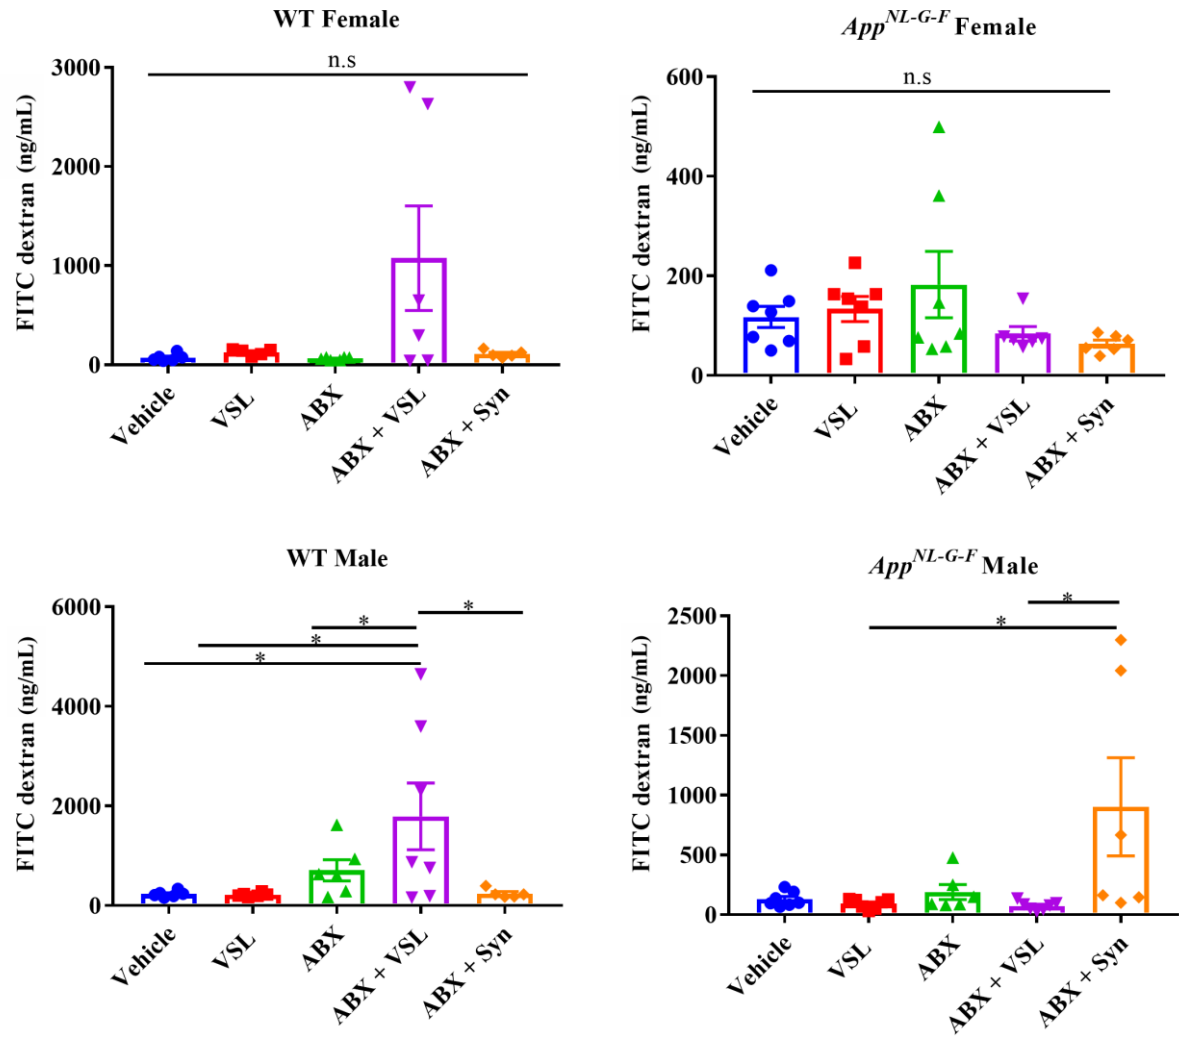

**Figure S2.** Effect of probiotic and antibiotics treatments on intestinal permeability in female and male C57BL/6J (WT) and *App*<sup>NL-G-F</sup> mice. Permeability assays were performed on female and male C57BL/6J (WT) and *App*<sup>NL-G-F</sup> mice following completion of the treatment paradigm. The concentration of 4 kDa FITC-conjugated dextran was measured in serum 5 h after oral gavage. Data are presented as mean  $\pm$  SEM. Significant differences were determined by one-way analysis of variance, \*  $p < 0.05$  ( $n = 7$ ).

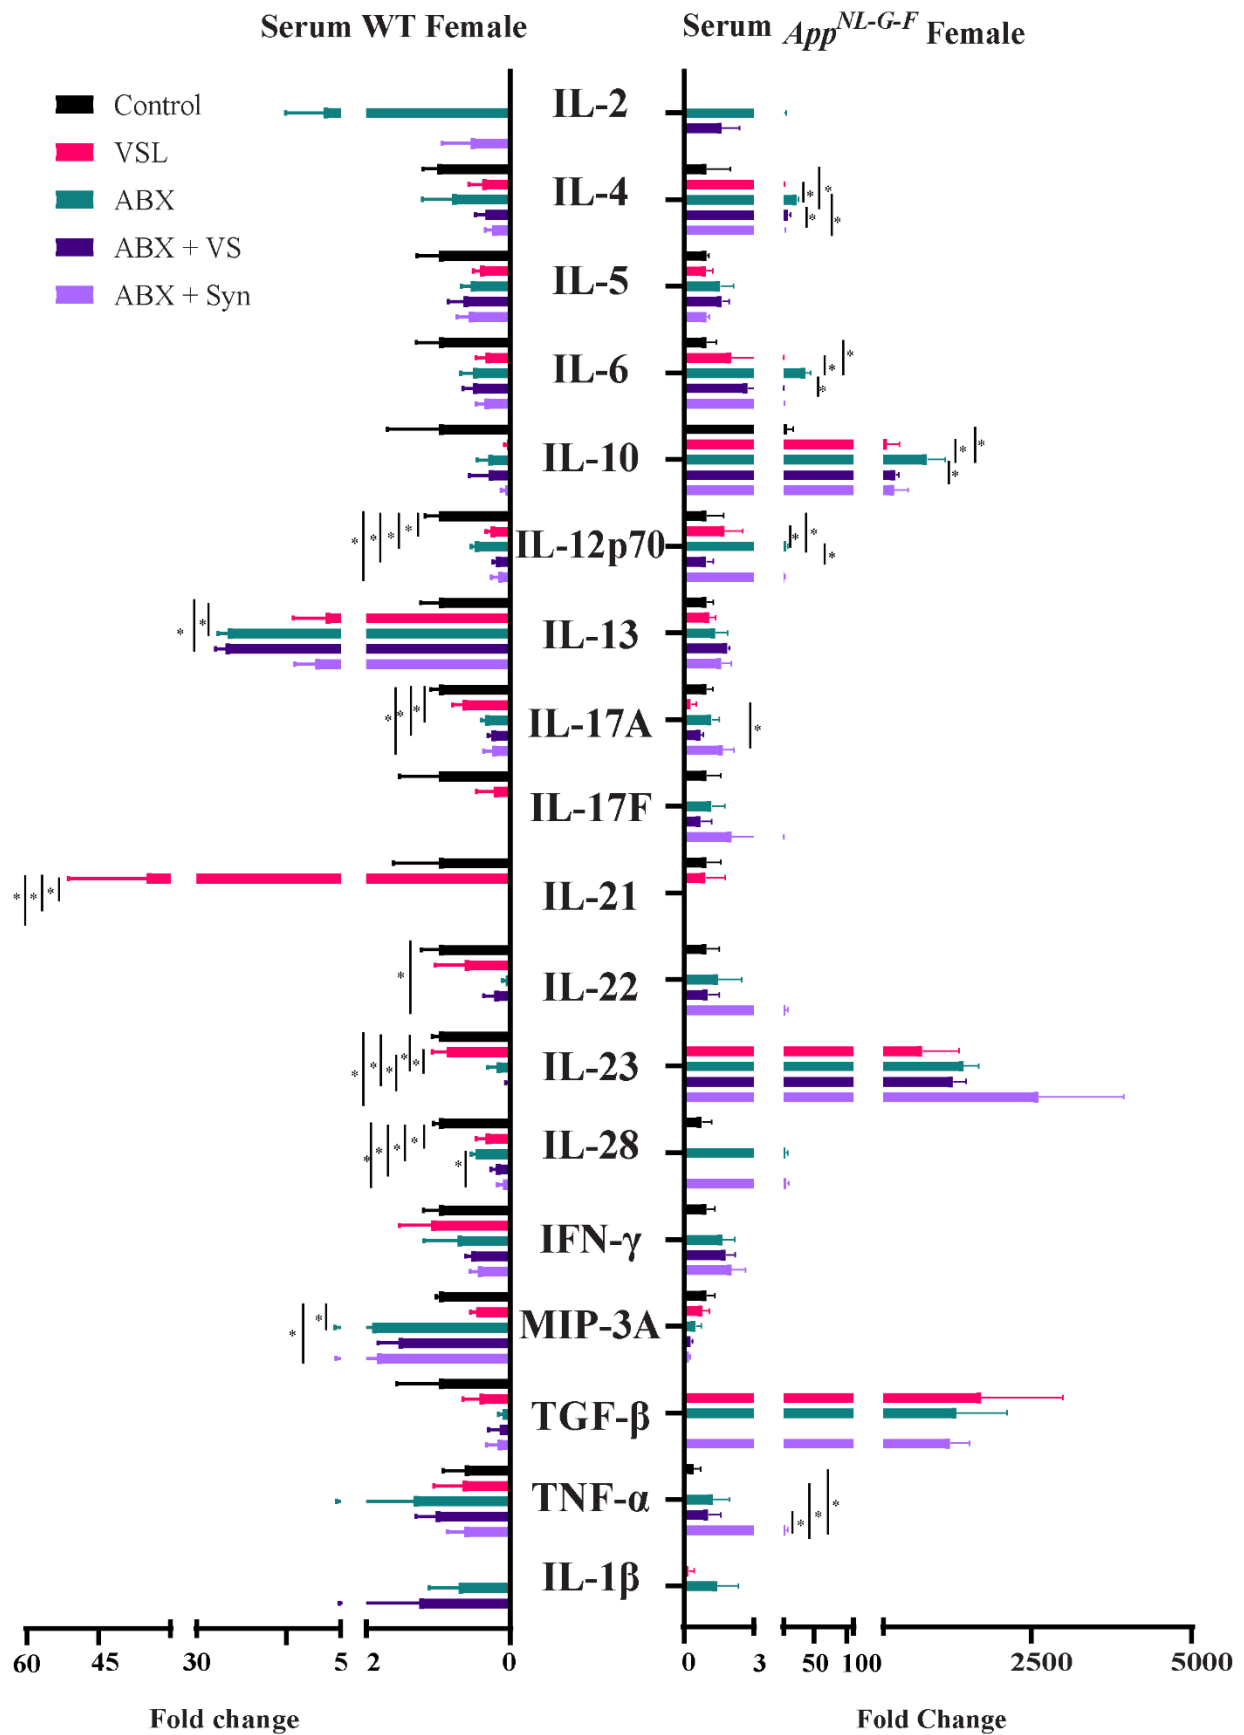

**Figure S3.** Quantification of Th1, Th2, and Th17 cytokines in the serum of female C57BL/6J (WT) and *App*<sup>NL-G-F</sup> mice. Serum cytokines from vehicle, VSL#3, antibiotics (ABX), antibiotics + VSL#3 (ABX + VSL), and antibiotics + VSL#3 + prebiotic (ABX + Syn) female WT mice were measured via commercial slide array. Data are presented as fold change with respect to controls. Significant differences were determined by one-way analysis of variance, \*  $p < 0.05$ .

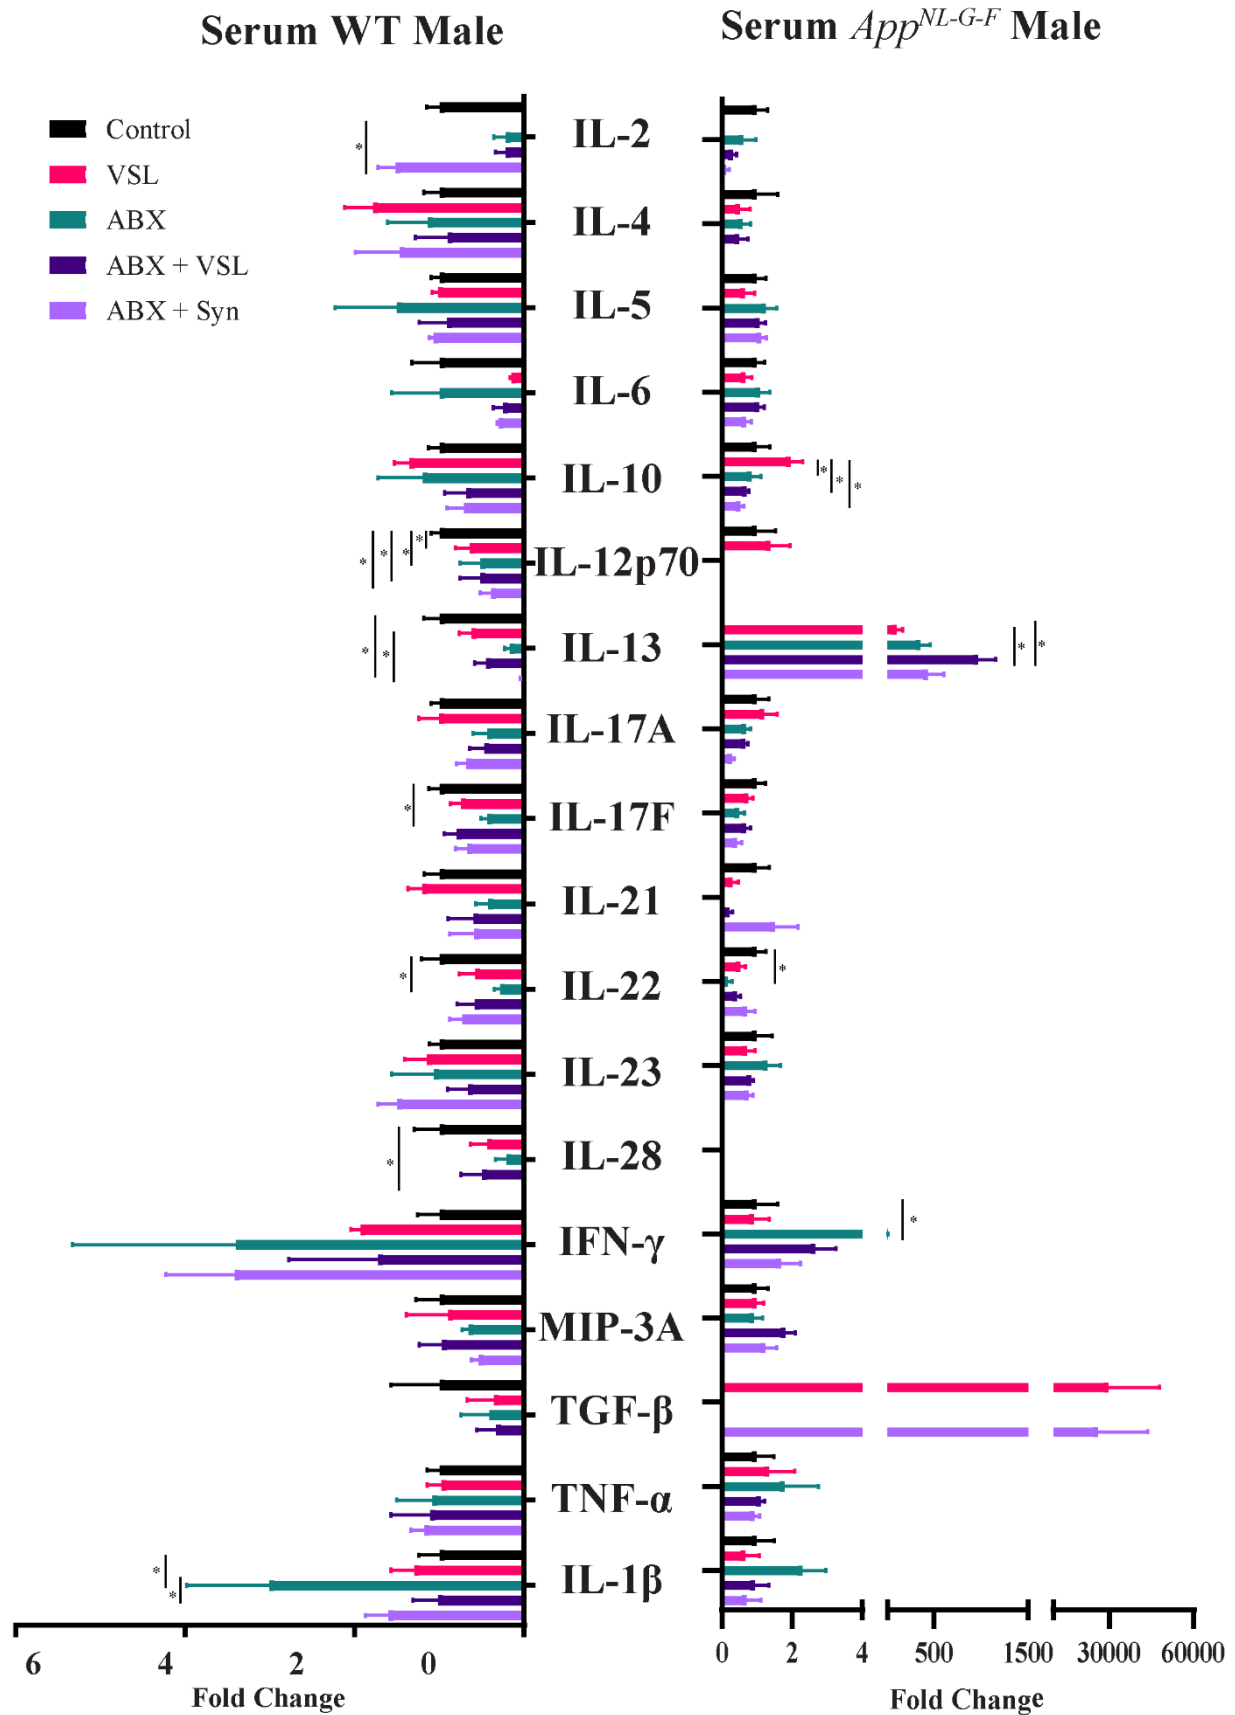

**Figure S4.** Quantification of Th1, Th2, and Th17 cytokines in the serum of male C57BL/6J (WT) and *App*<sup>NL-G-F</sup> mice. Serum cytokines from vehicle, VSL#3, antibiotics (ABX), antibiotics + VSL#3 (ABX + VSL), and antibiotics + VSL#3 + prebiotic (ABX + Syn) male WT mice were measured via commercial slide array. Data are presented as fold change with respect to controls ( $n = 5$ ). Significant differences were determined by one-way analysis of variance, \*  $p < 0.05$ .
